# Supplementary material for: Detargeting the target in phoneme detection: aiming the task at phonological representations rather than backgrounds
Source: Frontiers journal article supplement (doi:10.3389/flang.2024.1254956), 2025-02-14
Supplement: Data_Sheet_5.pdf [file Data_Sheet_5.pdf]

Supplementary Table E1

## Summary of Conditions and Trials for Experiment 2

| Trial Type                                                                                                                        | Listening Targets                                                   |                                                                             |
|-----------------------------------------------------------------------------------------------------------------------------------|---------------------------------------------------------------------|-----------------------------------------------------------------------------|
|                                                                                                                                   | Dorsal [x] / [ç]                                                    | Glottal [h]                                                                 |
| Critical Trials <sup>a</sup>                                                                                                      |                                                                     |                                                                             |
| Licit ( $n = 24$ )                                                                                                                |                                                                     |                                                                             |
| Front [ɛç]                                                                                                                        | [...ɛçt] ( $n = 8$ )<br>e.g., [glɛçt], [plɛçt], [ʃmɛçt],<br>[kɛçt]  |                                                                             |
| Back [ax]                                                                                                                         | [...axt] ( $n = 8$ )<br>e.g., [glaxt], [plaxt], [kvaxt],<br>[kaxt]  |                                                                             |
| Onset $\sigma$ [hV...t]                                                                                                           |                                                                     | $\sigma$ [hV...t] ( $n = 8$ )<br>e.g., [hamt], [halpt], [hent],<br>[helkt]  |
| Illicit ( $n = 24$ )                                                                                                              |                                                                     |                                                                             |
| Back+Front *[aç]                                                                                                                  | *[...açt] ( $n = 8$ )<br>e.g., [glaçt], [plaçt], [ʃmaçt],<br>[kaçt] |                                                                             |
| Front+Back *[ɛx]                                                                                                                  | *[...ɛxt] ( $n = 8$ )<br>e.g., [glɛxt], [plɛxt], [kvɛxt],<br>[kɛxt] |                                                                             |
| Coda *[...Vht] $\sigma$                                                                                                           |                                                                     | *[...Vht] $\sigma$ ( $n = 8$ )<br>e.g., [kaht], [glaht], [deht],<br>[pleht] |
| Distractors ( $n = 144$ )<br>e.g., <i>tuffen</i> , <i>trauden</i> , <i>Steim</i> ,<br><i>multig</i> , <i>Amtel</i> , <i>Notte</i> | ( $n = 96$ )                                                        | ( $n = 48$ )                                                                |
| Fillers ( $n = 192$ )<br>e.g., <i>Schneu</i> , <i>narblich</i> ,<br><i>Skebling</i>                                               | ( $n = 128$ )                                                       | ( $n = 64$ )                                                                |
| Total ( $N = 384$ )                                                                                                               | $N = 256$                                                           | $N = 128$                                                                   |

<sup>a</sup>All critical trials were monosyllables with the listening target as final segment in a coda cluster.

# Supplement E: Summary and Details of Stimuli for Experiment 2

## Supplementary Table E2

### Experiment 2 Onset and Duration of Pre-Target and Target Segments (ms)

| Condition              | <i>n</i> | Fricative |           |          |           | Listening Target [t] |           |          |           |
|------------------------|----------|-----------|-----------|----------|-----------|----------------------|-----------|----------|-----------|
|                        |          | Onset     |           | Duration |           | Onset                |           | Duration |           |
|                        |          | <i>M</i>  | <i>SD</i> | <i>M</i> | <i>SD</i> | <i>M</i>             | <i>SD</i> | <i>M</i> | <i>SD</i> |
| Licit contexts         |          |           |           |          |           |                      |           |          |           |
| Back [ax]              | 8        | 258       | 61        | 162      | 19        | 420                  | 53        | 184      | 134       |
| Front [εç]             | 8        | 275       | 67        | 160      | 20        | 435                  | 76        | 180      | 18        |
| Onset-[h]              | 8        | 5         | 1         | 114      | 20        | 393                  | 55        | 176      | 28        |
| Illicit contexts       |          |           |           |          |           |                      |           |          |           |
| Back+Front *[aç]       | 8        | 281       | 69        | 199      | 20        | 480                  | 53        | 149      | 13        |
| Front+Back *[εx]       | 8        | 300       | 60        | 153      | 17        | 454                  | 51        | 180      | 20        |
| *Coda-[h]              | 8        | 236       | 65        | 316      | 39        | 552                  | 73        | 200      | 24        |
| Distractors (with [t]) | 144      | –         | –         | –        | –         | 102                  | 109       | 81       | 44        |

*Note.* For [x]- and [ç]-conditions, the fricative immediately precedes the listening target [t]. For the illicit-[h] condition, [h] immediately precedes the listening target in the syllable coda. Distractor measures here are collapsed across all positions of the stimuli, and so susceptible to item effects.

## Supplement E: Summary and Details of Stimuli for Experiment 2

### Supplementary Table E3

#### Experiment 2 Distractors: Listening Target Onset and Duration (ms)

| Position              | <i>n</i> | Listening Target [t] |           |          |           |
|-----------------------|----------|----------------------|-----------|----------|-----------|
|                       |          | Onset                |           | Duration |           |
|                       |          | <i>M</i>             | <i>SD</i> | <i>M</i> | <i>SD</i> |
| 1 <sup>st</sup> phone | 72       | 4                    | 0         | 44       | 15        |
| 2 <sup>nd</sup> phone | 21       | 148                  | 19        | 90       | 13        |
| 3 <sup>rd</sup> phone | 26       | 176                  | 38        | 129      | 23        |
| 4 <sup>th</sup> phone | 21       | 254                  | 61        | 133      | 29        |
| 5 <sup>th</sup> phone | 4        | 335                  | 46        | 104      | 46        |

*Note.* Where [t] is preceded by [s] in a medial cluster, the duration of [t] is shorter. When [t] occurs as the 5<sup>th</sup> phone in the stimuli, these medial cases (2 of 4) reduce the mean duration (and increase the corresponding standard deviation) of the [t]-Target.
